# Supplementary material for: Suitability of continuous glucose monitoring in healthy subjects to detect effects of meal sequences and nutritional content of meals on postprandial glycemic responses
Source: Research Square preprint supplement (doi:10.21203/rs.3.rs-1992681/v1), 2022-09-28
Supplement: Supplementary file 1 [file dde5a4539e1b853ab4c3ee70.xlsx]

## Sheet: Table1
Table 1: Pre- and postprandial glucose traces on intervention days with synchronized standardized meal intake for breakfast and lunch and free-choice meal for dinner. Values and metrics of 36 subjects were averaged for the synchronized meal intake (2 days).
	Median (IQR)	n	Median (IQR)	n
	Breakfast (TM „fast“)		Breakfast (TM „slow“)
Premeal glucose [mg/dl]	89.3	36	86.2	36
	(82.1 - 94.8)		(81.7 - 93.3)
Time to peak [hh:mm]	00:36:00	36	00:44:00	20
	(00:32 - 00:38)		(00:41- 00:51)
Peak glucose [mg/dl]	144.1	36	108.9	20
	(135.6 - 155.6)		(104.2 - 116.0)
Glucose increase [mg/dl]	56.5	36	22.1	20
	(48.4 - 69.6)		(18.7 - 27.4)
	Lunch (TM "slow")		Lunch (TM "fast")
Premeal glucose [mg/dl]	88.2	36	90.4	36
	(85.0 - 92.4)		(87.2 - 98.3)
Time to peak [hh:mm]	00:50:00	36	00:46:00	35
	(00:45 - 00:59)		(00:42 - 00:52)
Peak glucose [mg/dl]	127.5	36	163.9	35
	(118.9 - 133.1)		(152.0 - 177.8)
Glucose increase [mg/dl]	38.3	36	72.7	35
	(29.5 - 44.7)		(59.9 - 84.8)
	Dinner (after TM "fast-slow")		Dinner (after TM "slow-fast")
Premeal glucose [mg/dl]	89.6	36	86.8	35
	(84.2 - 94.2)		(83.2 - 93.3)
Time to peak [hh:mm]	00:51:00	36	00:55:00	35
	(00:44 - 00:59)		(00:49 - 01:00)
Peak glucose [mg/dl]	142.2	36	156.2	35
	(131.8 - 152.0)		(141.4 - 164.1)
Glucose increase [mg/dl]	49.8	36	65.5	35
	(43.1 - 64.0)		(50.7 - 79.2)
